# Supplementary material for: Tuning the d-band center of NiC2O4 with Nb2O5 to optimize the Volmer step for hydrazine oxidation-assisted hydrogen production
Source: Royal Society of Chemistry journal article supplement (doi:10.1039/d2gc01158a), 2022-01-01
Supplement: d2gc01158a1.pdf [file d2gc01158a1.pdf]

## Electronic Supplementary Information

### **Tuning the d-band center of NiC<sub>2</sub>O<sub>4</sub> with Nb<sub>2</sub>O<sub>5</sub> to optimize the Volmer step for hydrazine oxidation-assisted hydrogen production**

Xiao Hui Chen <sup>a</sup>, Hong Chuan Fu <sup>a</sup>, Li Li Wu <sup>a</sup>, Xiao Lin Li <sup>a</sup>, Bo Yang <sup>a</sup>, Ting Li <sup>a</sup>,  
Fei Gu <sup>a</sup>, Jing Lei Lei <sup>b</sup>, Nian Bing Li <sup>a,\*</sup>, Hong Qun Luo <sup>a,\*</sup>

<sup>a</sup> School of Chemistry and Chemical Engineering, Southwest University, Chongqing 400715,  
People's Republic of China

<sup>b</sup> School of Chemistry and Chemical Engineering, Chongqing University, Chongqing 400044,  
People's Republic of China

\*Corresponding author.

Nian Bing Li and Hong Qun Luo

E-mail address: linb@swu.edu.cn; luohq@swu.edu.cn

## Experimental Section

*Material and reagent:* Niobium pentachloride (NbCl<sub>5</sub>), ethylenediamine solution (EDA), and thiourea (CH<sub>4</sub>N<sub>2</sub>S) were manufactured by Aladdin Co., Ltd. (Shanghai, China), Yuexiang Chemical Co., Ltd. (Chongqing, China), and Macklin Co., Ltd. (Chengdu, China), respectively. Nafion (5 wt %) and oxalic acid (H<sub>2</sub>C<sub>2</sub>O<sub>4</sub>) were purchased from Sigma-Aldrich (Chongqing, China). The potassium hydroxide (KOH) used in this work was produced in Chuandong Chemical Co., Ltd. (Chengdu, China). Ni foam (NF) was purchased from Cyber Electrochemistry (Beijing, China).

*Electrochemical performance:* All electrochemical parameters of the synthesized catalysts were obtained from CHI 660E electrochemical workstation. A graphite rod, Ag/AgCl (KCl saturated) and SNiC<sub>2</sub>O<sub>4</sub>-Nb<sub>2</sub>O<sub>5</sub>/NF (0.5 cm<sup>2</sup>) were served as the counter, reference and working electrodes, respectively. The electrochemical impedance spectroscopy (EIS) was recorded in the frequency range from 1 MHz to 0.01 Hz ( $\eta = 127$  mV for HER and  $\eta = 343$  mV for OER). The OWS performance was tested in a two-electrode system using SNiC<sub>2</sub>O<sub>4</sub>-Nb<sub>2</sub>O<sub>5</sub>/NF as the catalyst. The obtained potentials were all converted into reversible hydrogen electrode (RHE) on the basis of Nernst equation. The polarization curve was obtained at a scan rate of 5 mV s<sup>-1</sup> in 1.0 M KOH or 1.0 M KOH/0.5 M N<sub>2</sub>H<sub>4</sub>.

The amounts of generated H<sub>2</sub>, O<sub>2</sub> and N<sub>2</sub> were collected in the H-type of the electrolytic cell using the drainage method. The Faraday efficiency (FE) was acquired according to the following formula:

$$FE = z \times n \times \frac{F}{I \times t} \times 100\% \quad \text{Eq. (1)}$$

where  $z$  is the electron transfer number,  $n$  is the amount (moles) of the generated gas in the experiment,  $F$  is the Faraday constant ( $96485.3 \text{ C mol}^{-1}$ ),  $I$  is the applied constant current (A), and  $t$  is the electrolysis time (s).

*Characterization:* The morphology of the obtained materials was observed by scanning electron microscopy (SEM, ZEISS Gemini 300, ZEISS, Germany) and transmission electron microscopy (TEM, Tecnai G220, Fei Corporation, Japan). The crystalline structures of samples were identified by powder X-ray diffraction (XRD, X' Pert PRO, PANalytical B.V., Holland) using Cu-K $\alpha$  radiation. The Raman spectra were measured on a Horiba Scientific LabRAM HR Evolution (HORIBA Jobin Yvon, France). The laser power used in Raman is 1.5 mW, and the radiation time is 30 s. The X-ray photoelectron spectroscopy (XPS) analysis was measured on Thermo Scientific K-Alpha using Mg-K $\alpha$  radiation (ThermoElectricity Instruments, USA).

*Computational methods:* We employed the Vienna Ab Initio Package (VASP)<sup>1, 2</sup> to perform all the density functional theory (DFT) calculations within the Generalized Gradient Approximation (GGA) using the Perdew-Burke-Ernzerhof (PBE) formulation<sup>3</sup>. We chose the projected augmented wave (PAW) potentials<sup>4, 5</sup> to describe the ionic cores and took valence electrons into account using a plane wave basis set with a kinetic energy cutoff of 400 eV. Partial occupancies of the Kohn–Sham orbitals were allowed using the Gaussian smearing method and a width of 0.05 eV. The electronic energy was considered self-consistent when the energy change was smaller than  $10^{-5}$  eV. A geometry optimization was considered convergent when the force change was smaller than 0.05 eV/Å. Grimme's DFT-D3 methodology<sup>6</sup> was used to describe the dispersion interactions. The vacuum spacing perpendicular to the plane of the structure is 15 Å. The Brillouin zone integral uses the surface structures of  $2 \times 2 \times 1$  monkhorst pack K point sampling. Nb<sub>2</sub>O<sub>5</sub> (001) and NiC<sub>2</sub>O<sub>4</sub> (-202)

surfaces had been established in our systems. Finally, the adsorption energies ( $E_{\text{ads}}$ ) are calculated by the following formula:

$$E_{\text{ads}} = E_{\text{ad/sub}} - E_{\text{ad}} - E_{\text{sub}} \quad \text{Eq. (2)}$$

where  $E_{\text{ad/sub}}$ ,  $E_{\text{ad}}$ , and  $E_{\text{sub}}$  are the optimized adsorbate/substrate system, the adsorbate in the structure, and the clean substrate, respectively. The free energy is calculated as follows:

$$G = E + ZPE - TS \quad \text{Eq. (3)}$$

where  $G$ ,  $E$ ,  $ZPE$ , and  $TS$  are the free energy, total energy from DFT calculations, zero point energy, and entropic contributions, respectively.

*The mechanism of HzOR:* It is known that the hydrazine oxidation process involves six steps

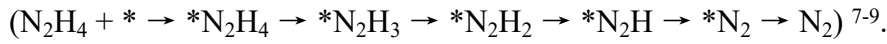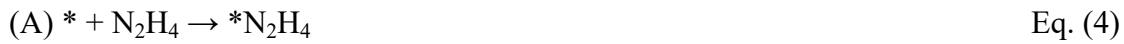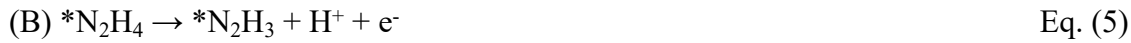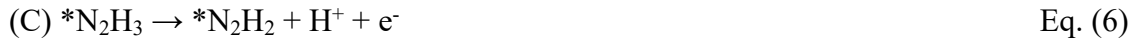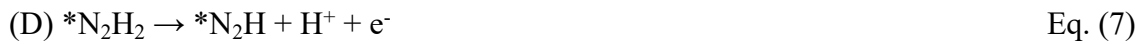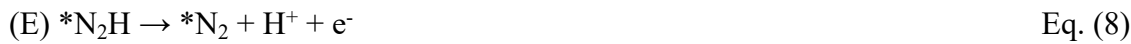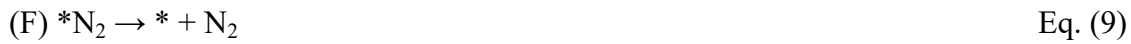

The asterisk (\*) represents the active sites. The rate-determining step of the reaction process depends on the characteristics of the catalyst, and is generally the step of forming  $\text{N}_2\text{H}_2$  or  $\text{N}_2\text{H}$ .

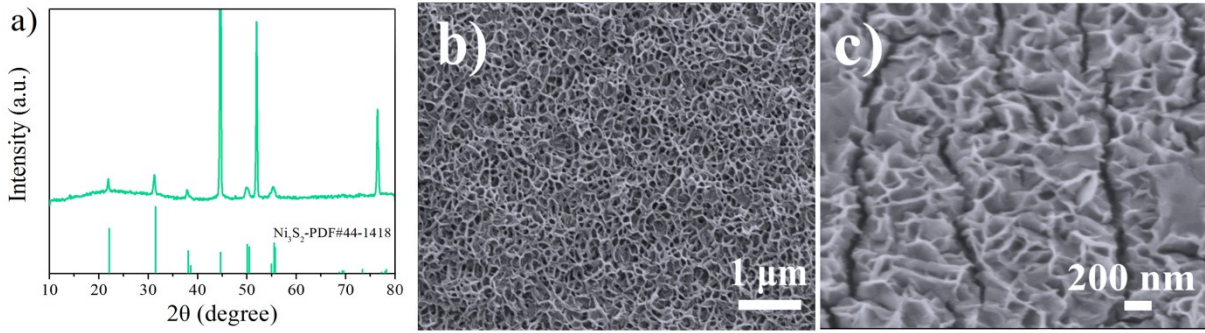

**Fig. S1.** a) XRD pattern and b-c) SEM images of  $\text{Ni}_3\text{S}_2$ .

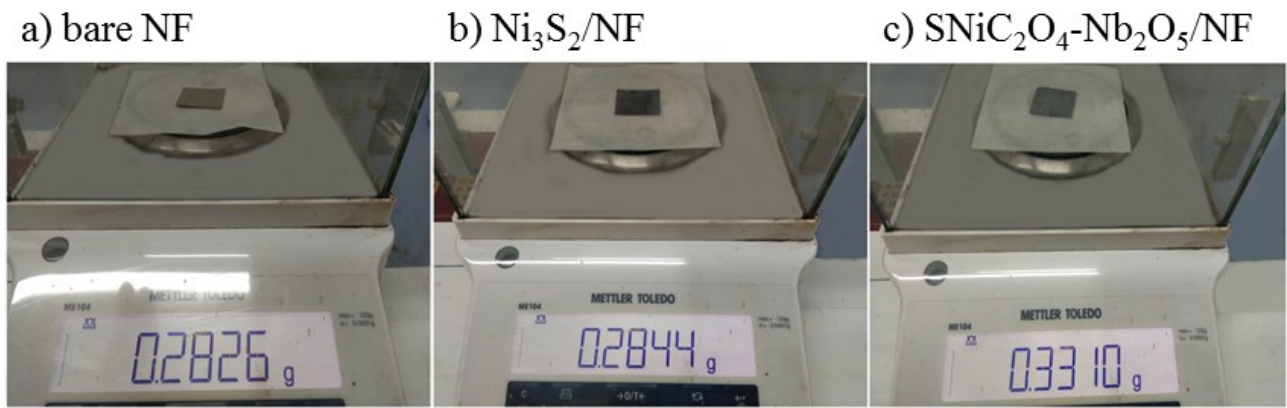

**Fig. S2.** The mass of a) bare NF ( $m_1$ , 0.2826 g), b)  $\text{Ni}_3\text{S}_2/\text{NF}$  ( $m_2$ , 0.2844 g), and c)  $\text{SNiC}_2\text{O}_4\text{-Nb}_2\text{O}_5/\text{NF}$  ( $m_3$ , 0.3310 g).

The loading mass ( $\Delta m$ ) of  $\text{SNiC}_2\text{O}_4\text{-Nb}_2\text{O}_5$  on NF is calculated as follows:

$$\Delta m = (m_3 - m_1) / A \quad \text{Eq. (10)}$$

where  $A$  is the area of NF ( $A = 3 \text{ cm} \times 3 \text{ cm}$ ). Thus,  $\Delta m$  of  $\text{SNiC}_2\text{O}_4\text{-Nb}_2\text{O}_5$  on NF is calculated to be  $5.4 \text{ mg cm}^{-2}$

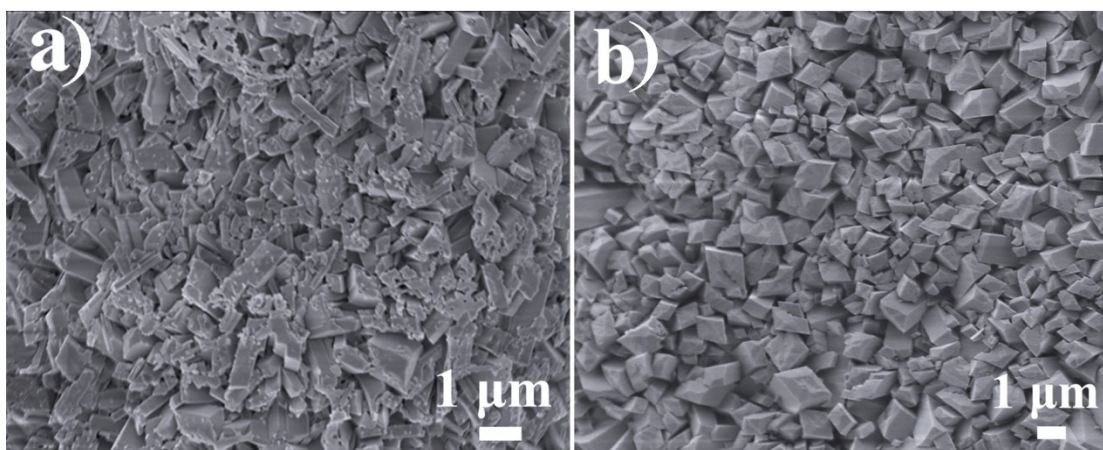

**Fig. S3.** SEM images of a) NiC<sub>2</sub>O<sub>4</sub> and b) SNiC<sub>2</sub>O<sub>4</sub>.

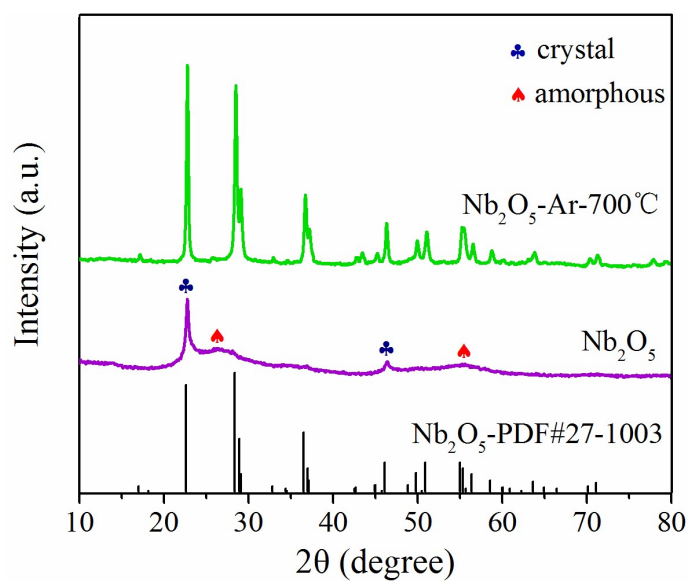

**Fig. S4.** XRD patterns of Nb<sub>2</sub>O<sub>5</sub> and the sample obtained by calcination of Nb<sub>2</sub>O<sub>5</sub> at 700°C for 1 hour under the protection of Ar.

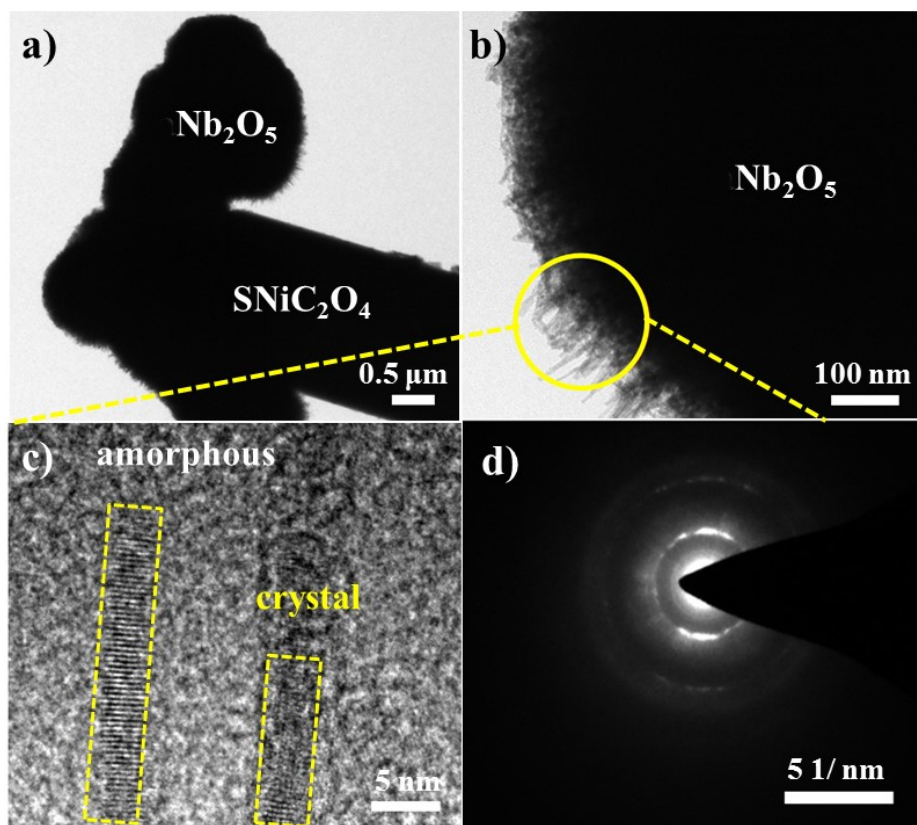

**Fig. S5.** a) TEM image of SNiC<sub>2</sub>O<sub>4</sub>-Nb<sub>2</sub>O<sub>5</sub>, b) TEM, c) high-resolution TEM and d) selected area electron diffraction (SAED) images of Nb<sub>2</sub>O<sub>5</sub>.

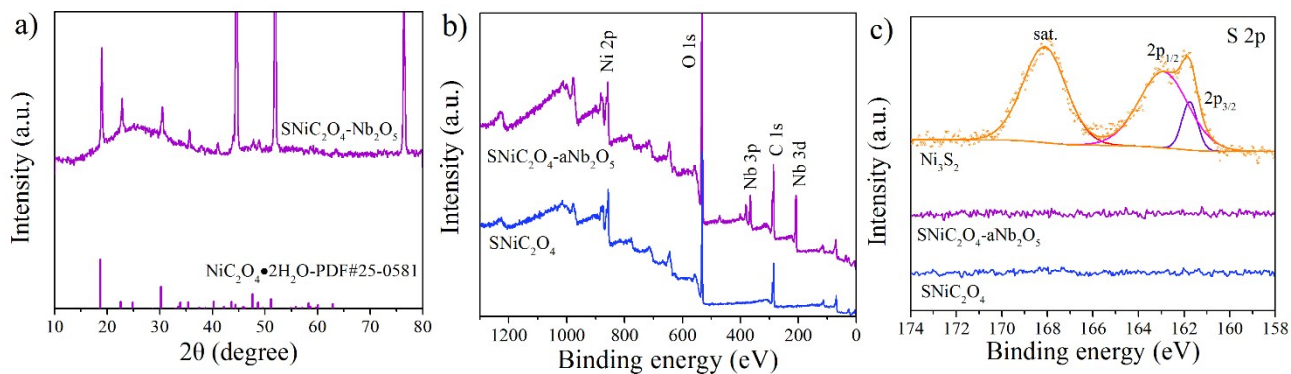

**Fig. S6.** a) XRD and b) XPS full survey spectra of  $\text{SNiC}_2\text{O}_4\text{-Nb}_2\text{O}_5$  and  $\text{SNiC}_2\text{O}_4$ . c) S 2p survey spectra of  $\text{Ni}_3\text{S}_2$ ,  $\text{SNiC}_2\text{O}_4$  and  $\text{SNiC}_2\text{O}_4\text{-Nb}_2\text{O}_5$ .

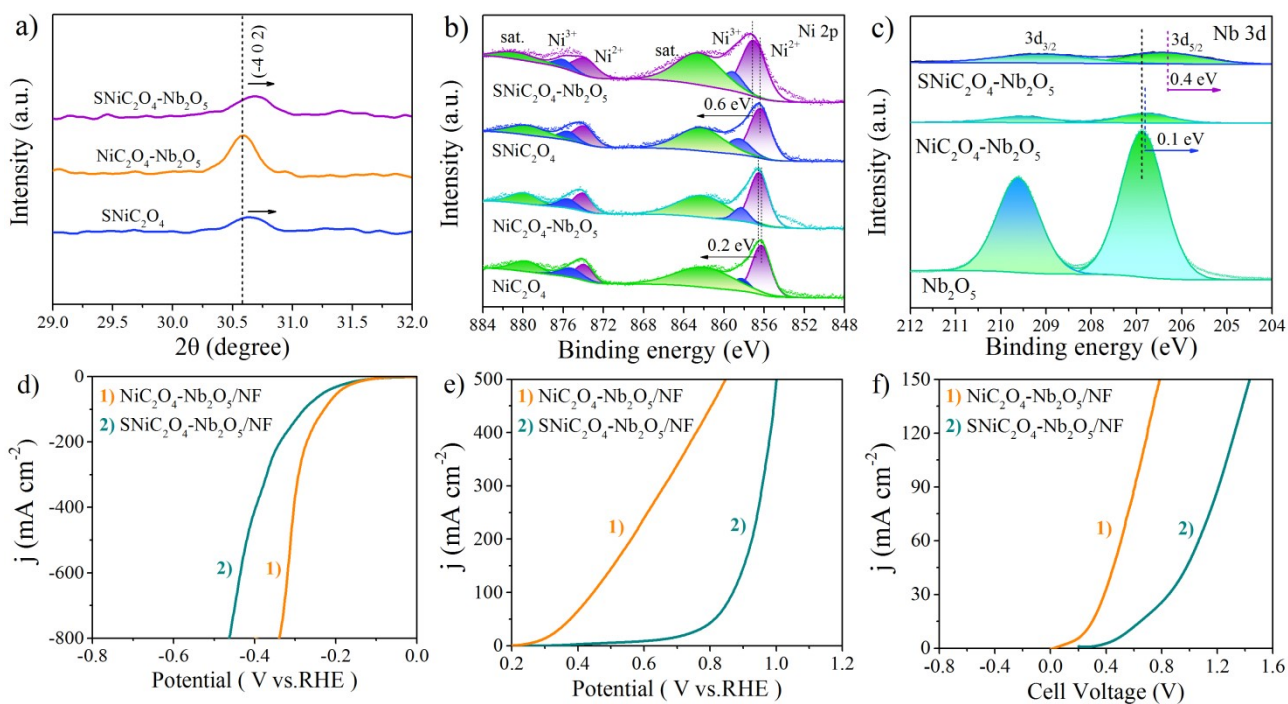

**Fig. S7.** a) The XRD peak of (-402) for  $\text{SNiC}_2\text{O}_4\text{-Nb}_2\text{O}_5$ ,  $\text{NiC}_2\text{O}_4\text{-Nb}_2\text{O}_5$ , and  $\text{SNiC}_2\text{O}_4$ . Comparison of b) Ni and c) Nb XPS spectral data of the as-prepared catalysts. LSV curves of  $\text{SNiC}_2\text{O}_4\text{-Nb}_2\text{O}_5/\text{NF}$  and  $\text{NiC}_2\text{O}_4\text{-Nb}_2\text{O}_5/\text{NF}$  for d) HER, e) HzOR, and f) OH<sub>2</sub>S.



**Table S1.** Summary of deconvoluted XPS peaks of the as-prepared catalysts for Ni 2p.

| Catalyst                                                         | 2p <sub>1/2</sub> (eV) |                  |                  | 2p <sub>3/2</sub> (eV) |                  |                  |
|------------------------------------------------------------------|------------------------|------------------|------------------|------------------------|------------------|------------------|
|                                                                  | sat.                   | Ni <sup>3+</sup> | Ni <sup>2+</sup> | sat.                   | Ni <sup>3+</sup> | Ni <sup>2+</sup> |
| <b>SNiC<sub>2</sub>O<sub>4</sub>-Nb<sub>2</sub>O<sub>5</sub></b> | 880.6                  | 875.9            | 873.8            | 862.5                  | 859.1            | 857.0            |
| <b>SNiC<sub>2</sub>O<sub>4</sub></b>                             | 879.5                  | 875.5            | 873.9            | 862.3                  | 858.5            | 856.4            |
| <b>NiC<sub>2</sub>O<sub>4</sub>-Nb<sub>2</sub>O<sub>5</sub></b>  | 879.9                  | 875.6            | 874.0            | 862.2                  | 858.3            | 856.5            |
| <b>NiC<sub>2</sub>O<sub>4</sub></b>                              | 879.7                  | 875.2            | 873.9            | 862.0                  | 858.3            | 856.3            |

**Table S2.** Summary of deconvoluted XPS peaks of the as-prepared catalysts for Nb 3d.

| Catalyst                                                         | 3d <sub>3/2</sub> (eV) | 3d <sub>5/2</sub> (eV) |
|------------------------------------------------------------------|------------------------|------------------------|
| <b>SNiC<sub>2</sub>O<sub>4</sub>-Nb<sub>2</sub>O<sub>5</sub></b> | 209.1                  | 206.4                  |
| <b>NiC<sub>2</sub>O<sub>4</sub>-Nb<sub>2</sub>O<sub>5</sub></b>  | 209.5                  | 206.8                  |
| <b>Nb<sub>2</sub>O<sub>5</sub></b>                               | 209.6                  | 206.9                  |

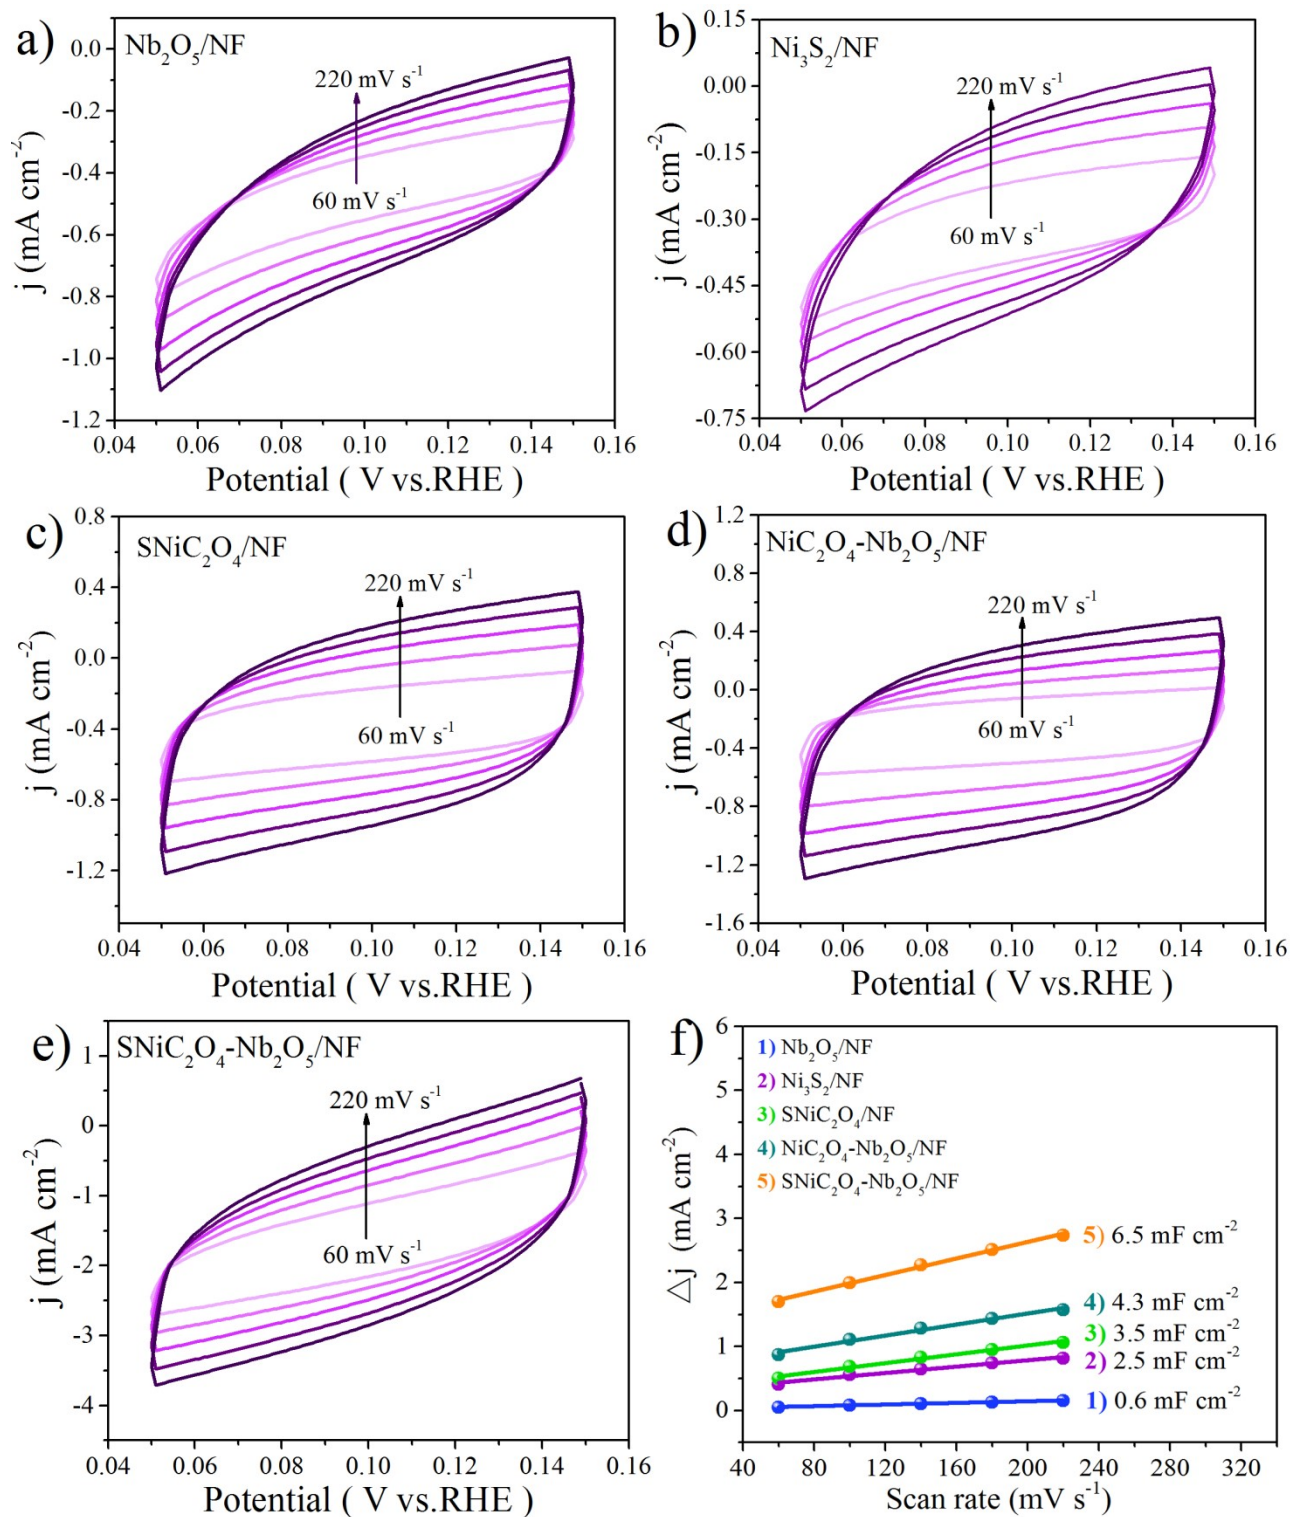

**Fig. S8.** CV curves of a)  $\text{Nb}_2\text{O}_5/\text{NF}$ , b)  $\text{Ni}_3\text{S}_2/\text{NF}$ , c)  $\text{SNiC}_2\text{O}_4/\text{NF}$ , d)  $\text{NiC}_2\text{O}_4\text{-Nb}_2\text{O}_5/\text{NF}$ , and e)  $\text{SNiC}_2\text{O}_4\text{-Nb}_2\text{O}_5/\text{NF}$  measured in 1.0 M KOH solution at scan rates from 60 to 220  $\text{mV s}^{-1}$ . f) The capacitive current at 0.10 V vs. RHE of the as-prepared catalysts.

The double layered capacitance ( $C_{dl}$ ) of  $\text{SNiC}_2\text{O}_4\text{-Nb}_2\text{O}_5/\text{NF}$  is the biggest, thus the catalytically relevant surface area for HER is the highest, mainly due to its more exposed active sites. The electrochemical surface area (ECSA) of  $\text{SNiC}_2\text{O}_4\text{-Nb}_2\text{O}_5/\text{NF}$  was estimated from their  $C_{dl}$  values, which have been measured using simple cyclic voltammetry method. Here the potential window has been chosen outside the possible Faradic region of the hybrid. Then the current is only generated for charging of double layer which is expected to have a linear relationship with the active surface area. The relationship between the capacitive current density,  $\Delta j$  ( $\Delta j = j_{\text{anodic}} - j_{\text{cathodic}}$  at 0.10 V vs. RHE), and the scan rate is linear and the double layer capacitance ( $C_{dl}$ ) has been calculated from the slope.

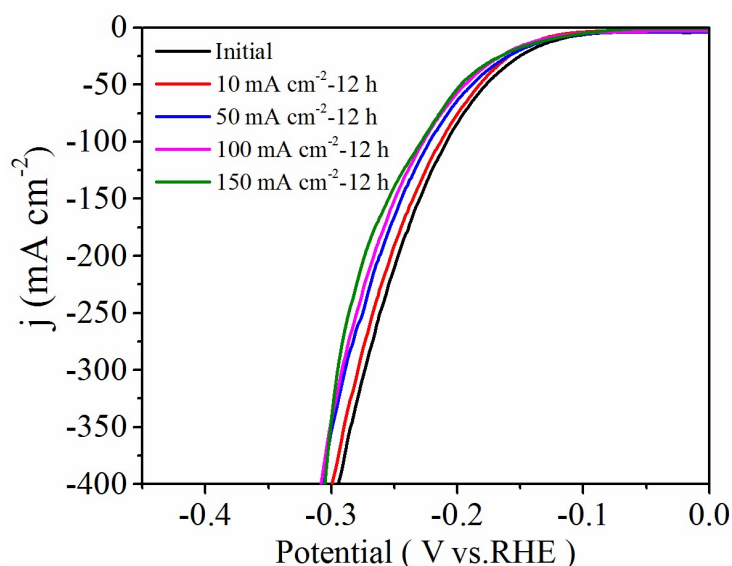

**Fig. S9.** LSV curves of  $\text{SNiC}_2\text{O}_4\text{-Nb}_2\text{O}_5/\text{NF}$  before and after maintaining the current density at -10, -50, -100, -150  $\text{mA cm}^{-2}$  for 12 h in HER.

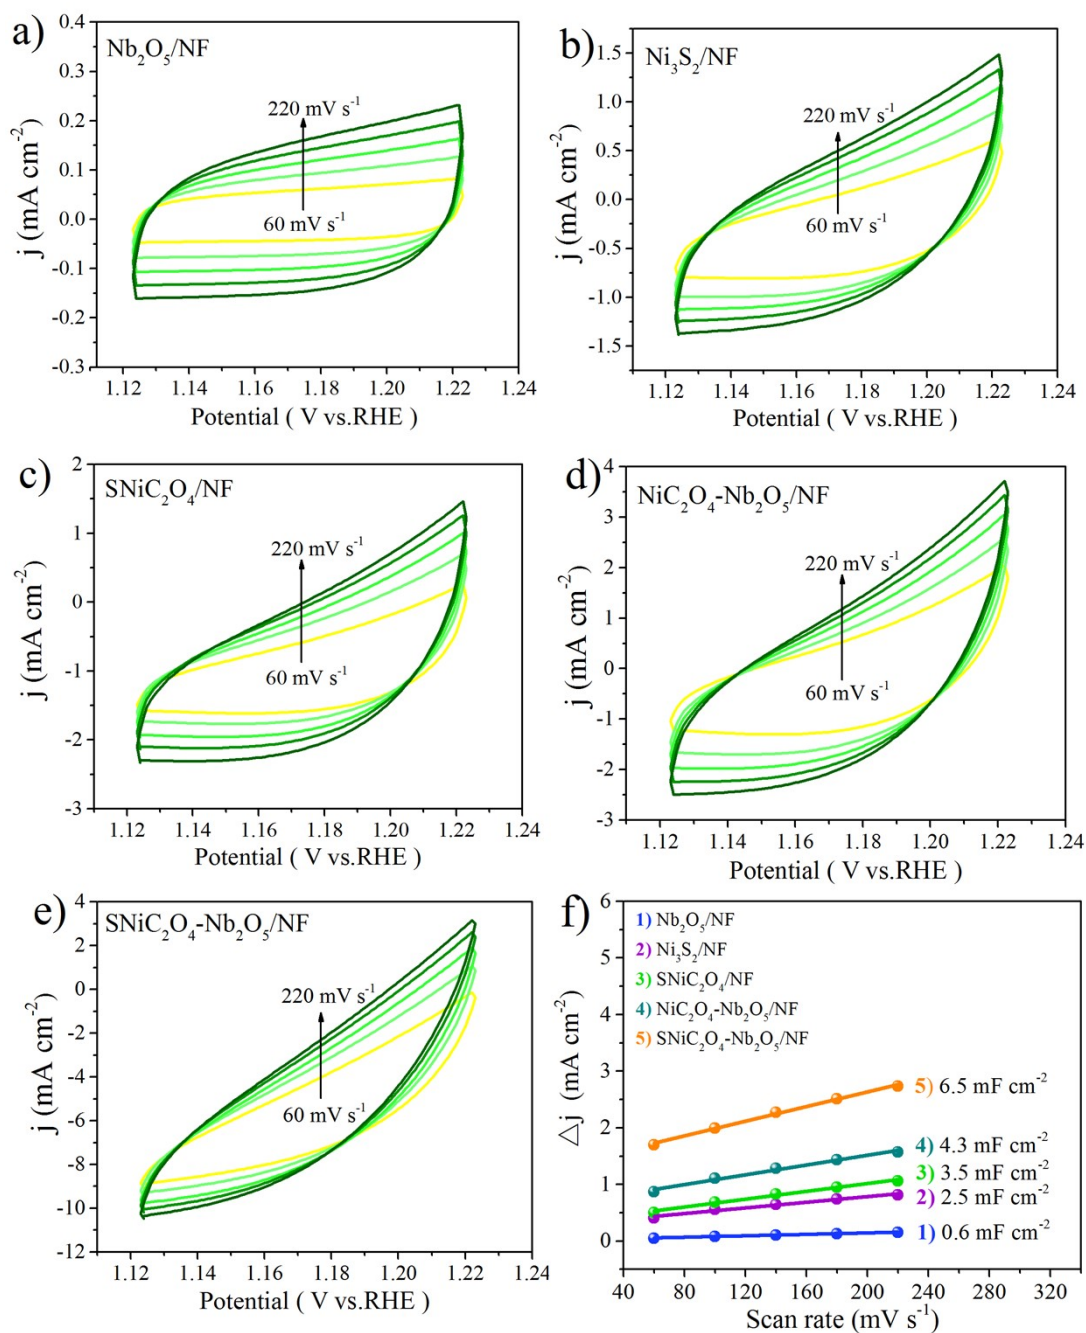

**Fig. S10.** CV curves of a)  $\text{Nb}_2\text{O}_5/\text{NF}$ , b)  $\text{Ni}_3\text{S}_2/\text{NF}$ , c)  $\text{SNiC}_2\text{O}_4/\text{NF}$ , d)  $\text{NiC}_2\text{O}_4\text{-Nb}_2\text{O}_5/\text{NF}$  and e)  $\text{SNiC}_2\text{O}_4\text{-Nb}_2\text{O}_5/\text{NF}$  measured in 1.0 M KOH solution at scan rates from 60 to 220  $\text{mV s}^{-1}$ . f) The capacitive current at 1.18 V vs. RHE of the as-prepared catalysts.

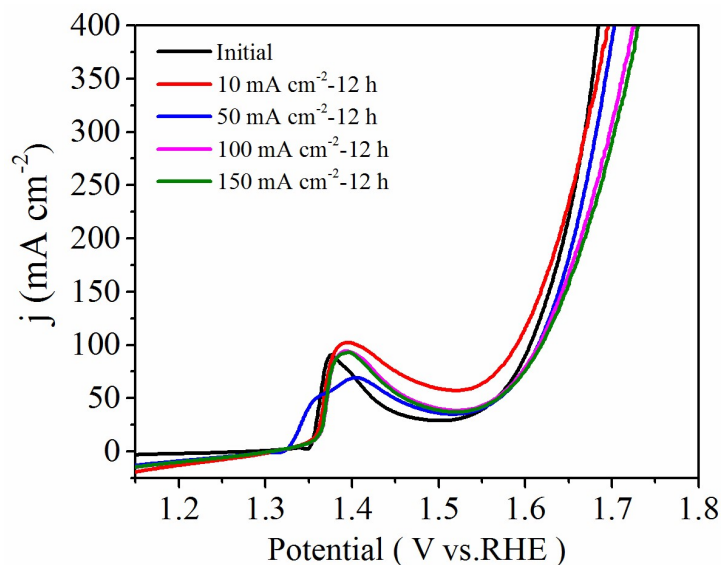

**Fig. S11.** LSV curves of SNiC<sub>2</sub>O<sub>4</sub>-Nb<sub>2</sub>O<sub>5</sub>/NF before and after maintaining the current density at 10, 50, 100, 150 mA cm<sup>-2</sup> for 12 h in OER.

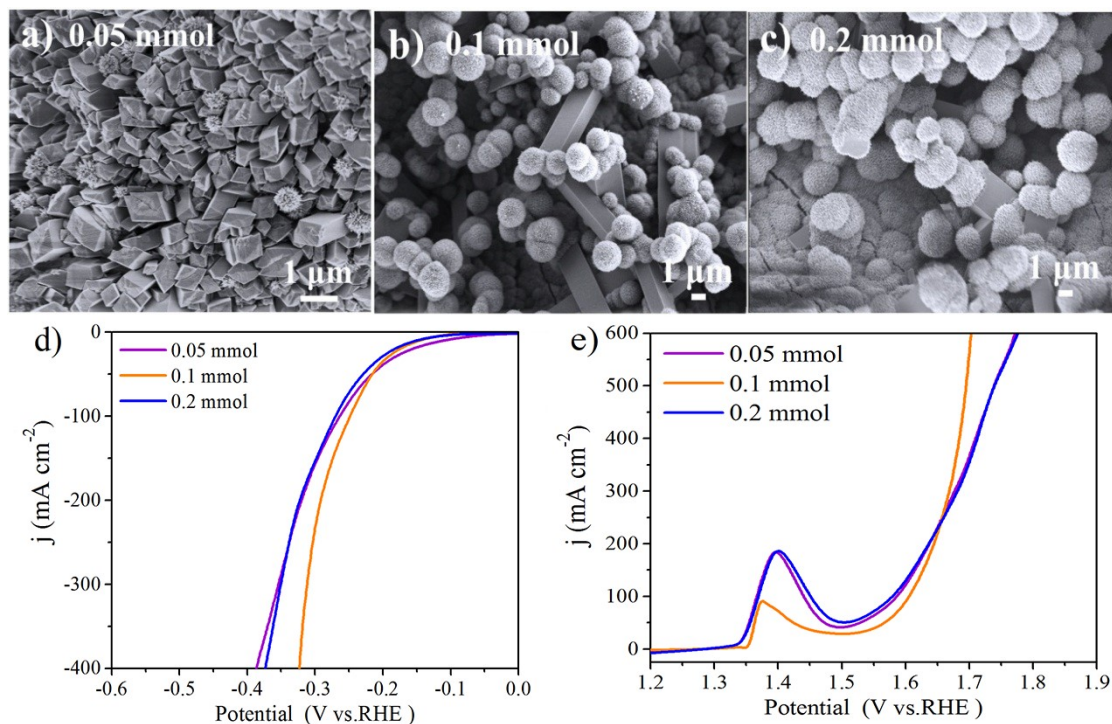

**Fig. S12.** SEM image of SNiC<sub>2</sub>O<sub>4</sub>-Nb<sub>2</sub>O<sub>5</sub> prepared by adding a) 0.05 mol, b) 0.1 mol and b) 0.2 mol of Nb<sup>5+</sup> in the hydrothermal process. d) HER and e) OER polarization curves of the above catalysts.

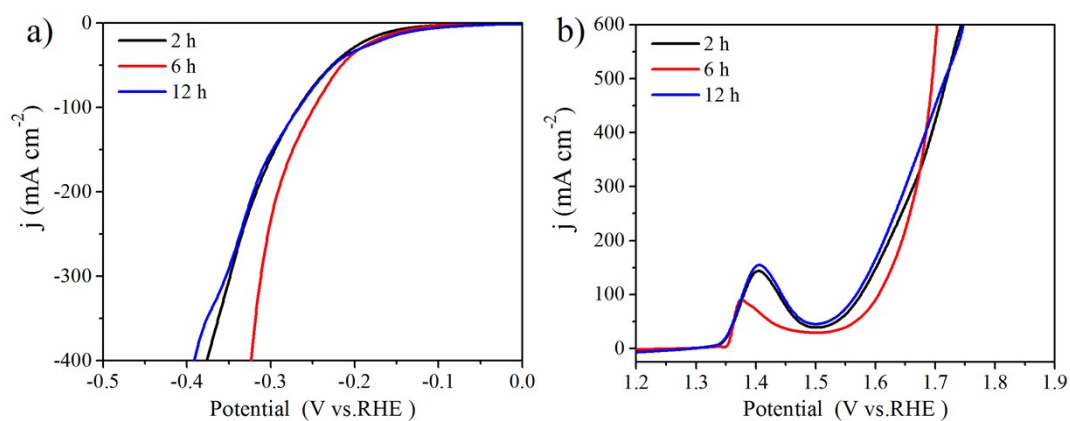

**Fig. S13.** HER a) and OER b) polarization curves of  $\text{SNiC}_2\text{O}_4\text{-Nb}_2\text{O}_5$  at different hydrothermal reaction times.

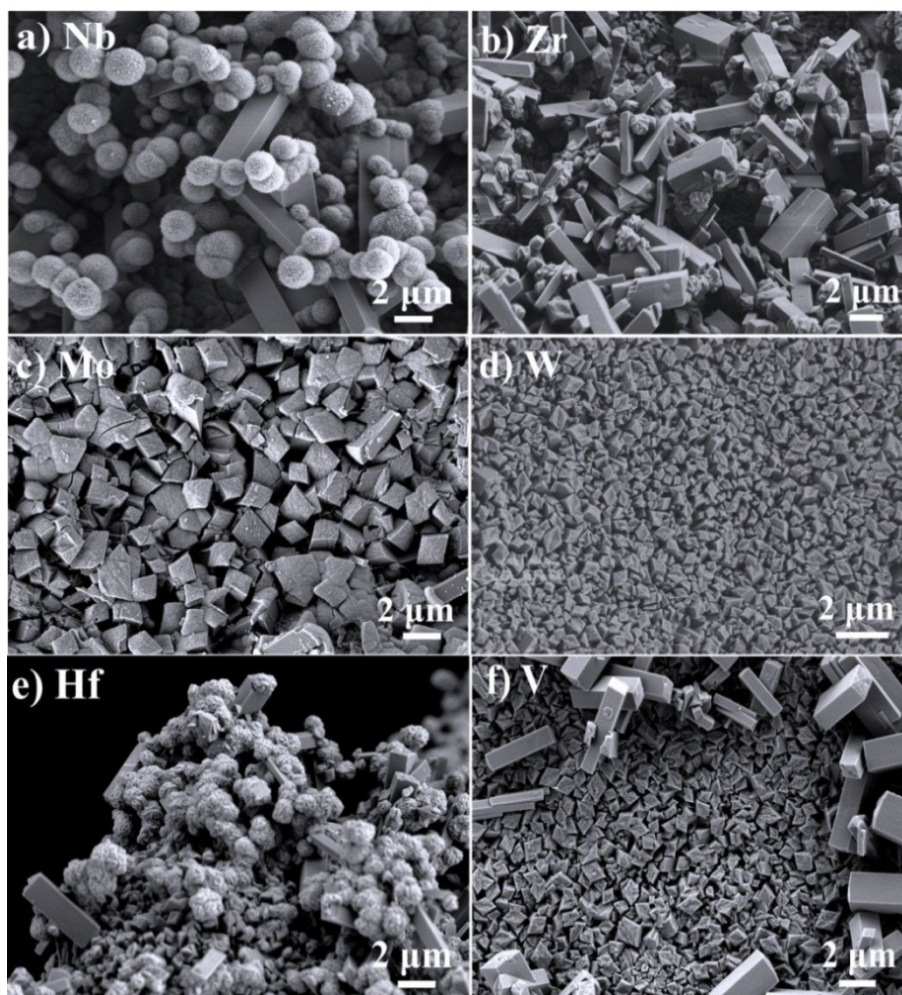

**Fig. S14.** SEM images of the catalysts prepared by adding 0.1 mmol of a)  $\text{NbCl}_5$ , b)  $\text{ZrCl}_4$ , c)  $\text{MoCl}_5$ , d)  $\text{WCl}_6$ , e)  $\text{HfCl}_4$ , and f)  $\text{VCl}_3$  in the hydrothermal process.

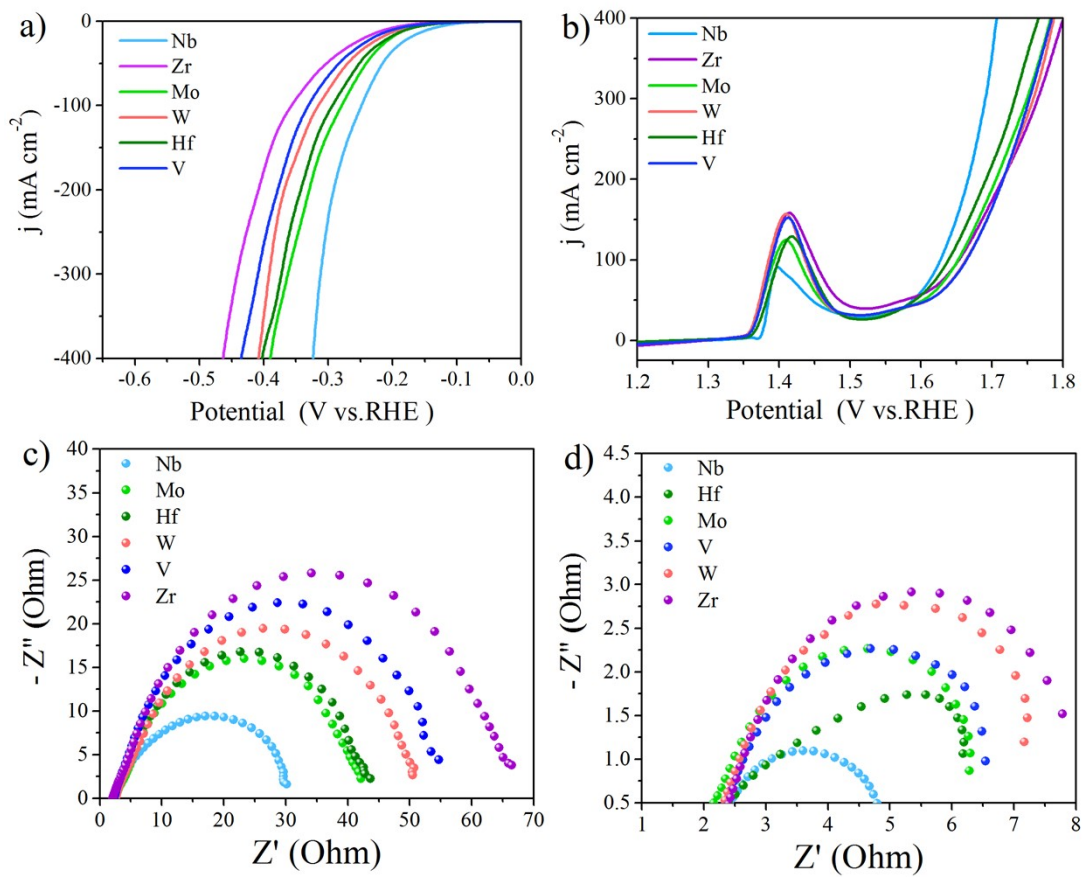

**Fig. S15.** a) HER and b) OER polarization curves of the catalysts prepared by adding 0.1 mmol of NbCl<sub>5</sub>, ZrCl<sub>4</sub>, MoCl<sub>5</sub>, WCl<sub>6</sub>, HfCl<sub>4</sub>, and VCl<sub>3</sub> in the hydrothermal process. EIS profiles of the above catalysts in c) HER and d) OER processes.

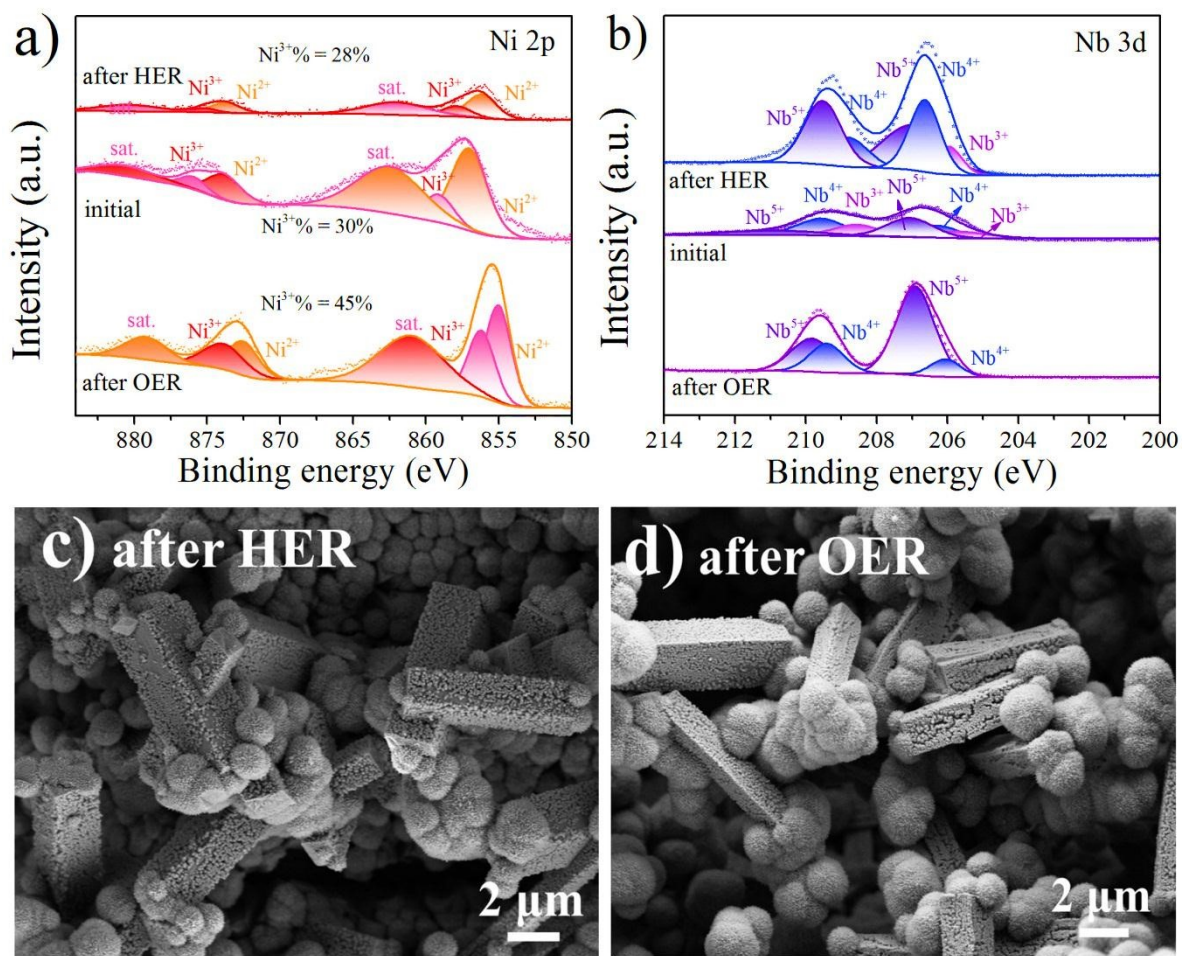

**Fig. S16.** XPS analysis comparison of  $\text{SNiC}_2\text{O}_4\text{-Nb}_2\text{O}_5$  before and after the tests. a) Ni 2p, b) Nb 3d. SEM images of  $\text{SNiC}_2\text{O}_4\text{-Nb}_2\text{O}_5$  after a) HER and b) OER test.



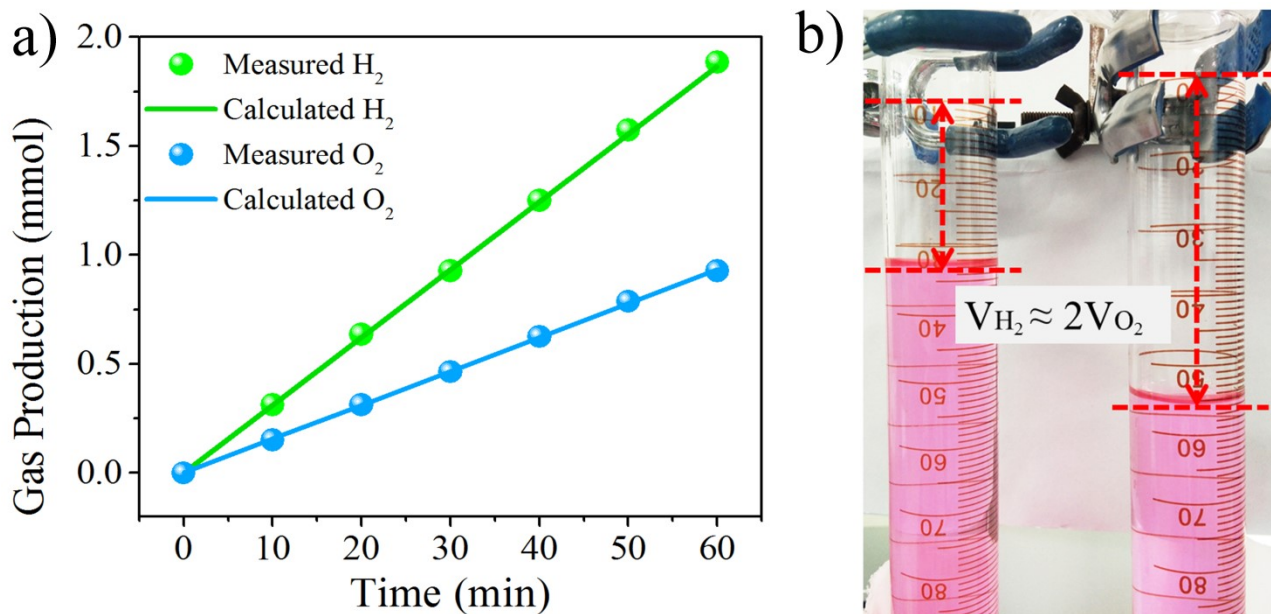

**Fig. S17.** (a) Experimental and theoretical amounts of H<sub>2</sub> and O<sub>2</sub> at a fixed current density of 100 mA cm<sup>-2</sup> for SNiC<sub>2</sub>O<sub>4</sub>-Nb<sub>2</sub>O<sub>5</sub>/NF. (b) Optical picture of the collected H<sub>2</sub> and O<sub>2</sub> by water drainage method.

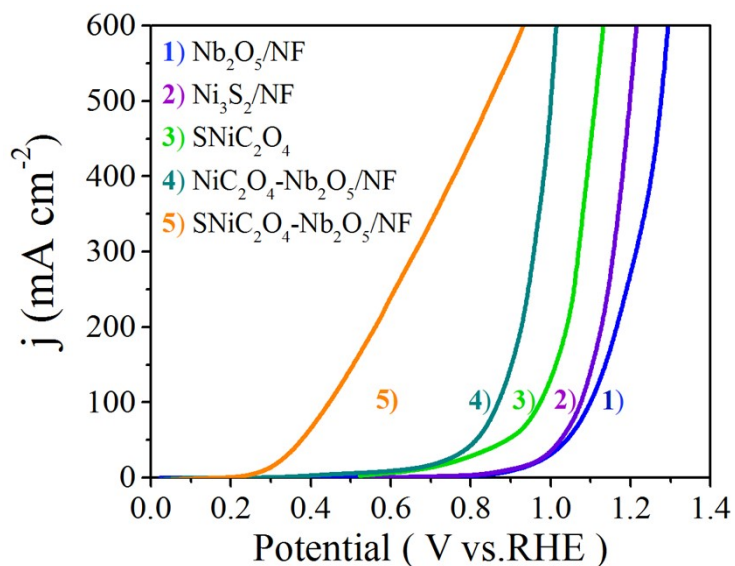

**Fig. S18.** LSV curves of Nb<sub>2</sub>O<sub>5</sub>, Ni<sub>3</sub>S<sub>2</sub>, SNiC<sub>2</sub>O<sub>4</sub>, NiC<sub>2</sub>O<sub>4</sub>-Nb<sub>2</sub>O<sub>5</sub> and SNiC<sub>2</sub>O<sub>4</sub>-Nb<sub>2</sub>O<sub>5</sub> grown on NF towards HzOR.

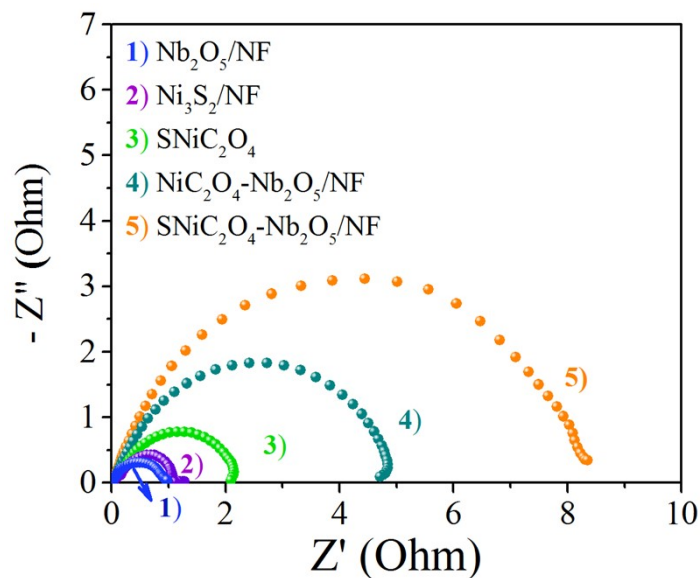

**Fig. S19.** EIS Nyquist plots of the as-prepared catalysts towards HzOR.

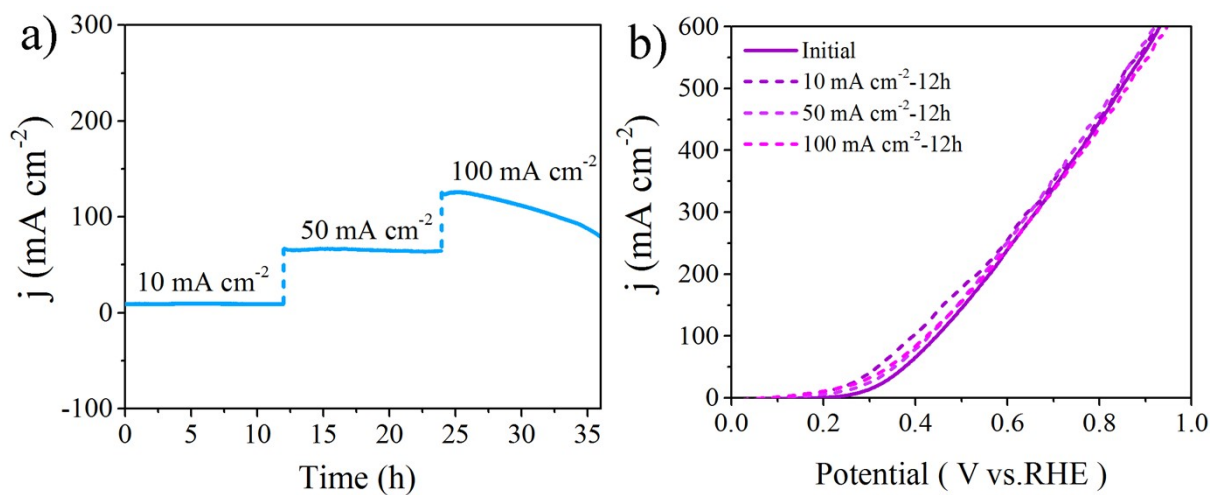

**Fig. S20.** a) Stability measurement of  $\text{SNiC}_2\text{O}_4\text{-Nb}_2\text{O}_5/\text{NF}$  at different current densities for 12 h. b) LSV curves of  $\text{SNiC}_2\text{O}_4\text{-Nb}_2\text{O}_5/\text{NF}$  before and after maintaining the current density at 10, 50, and 100  $\text{mA cm}^{-2}$  for 12 h in HzOR. The polarization curves collected after the electrolyte is replaced.

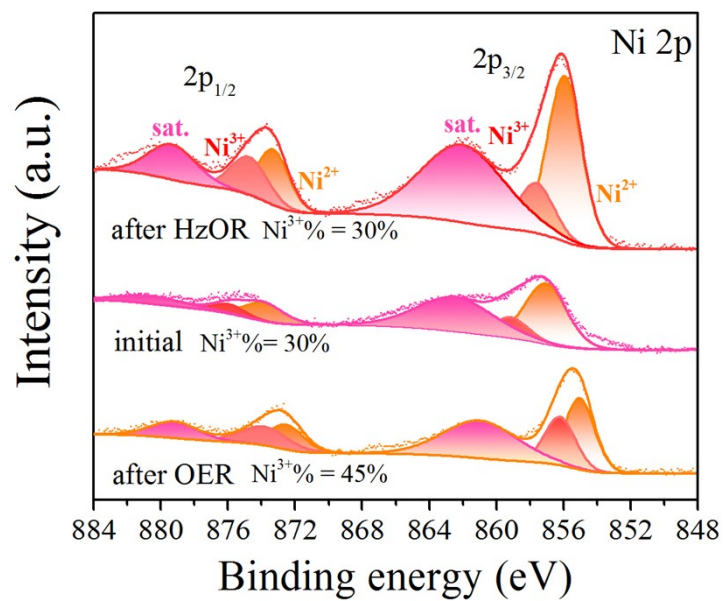

**Fig. S21.** Ni2p XPS spectral data of SNiC<sub>2</sub>O<sub>4</sub>-Nb<sub>2</sub>O<sub>5</sub> before and after OER and HzOR tests.

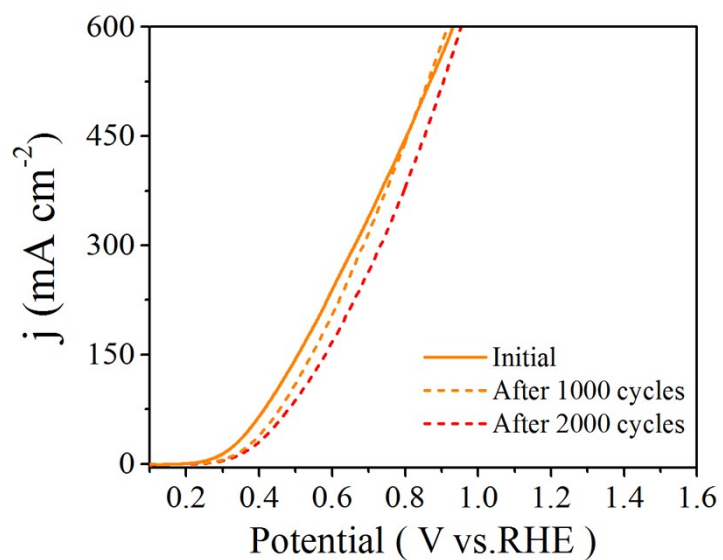

**Fig. S22.** Polarization curves of the SNiC<sub>2</sub>O<sub>4</sub>-Nb<sub>2</sub>O<sub>5</sub>/NF before and after 1000/2000 CV cycles for HzOR.

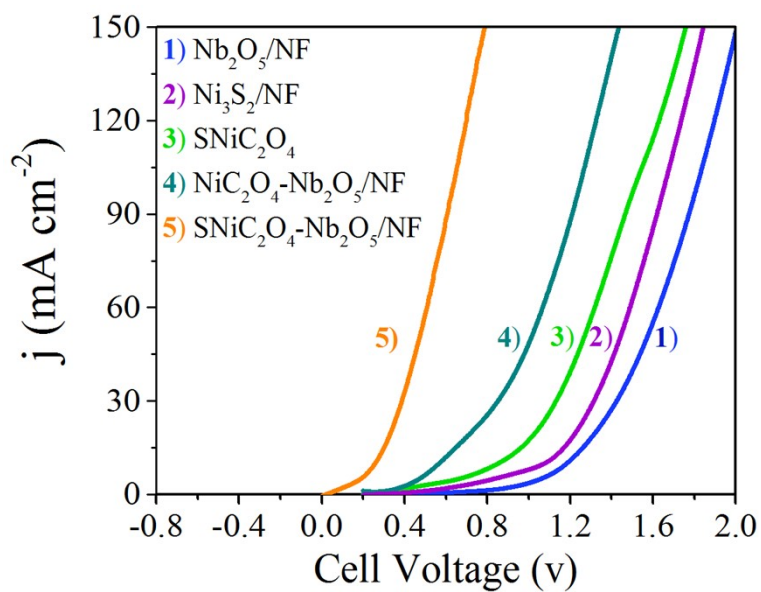

**Fig. S23.** LSV curves of  $\text{Nb}_2\text{O}_5$ ,  $\text{Ni}_3\text{S}_2$ ,  $\text{SNiC}_2\text{O}_4$ ,  $\text{NiC}_2\text{O}_4\text{-Nb}_2\text{O}_5$  and  $\text{SNiC}_2\text{O}_4\text{-Nb}_2\text{O}_5$  grown on NF towards OHzS.

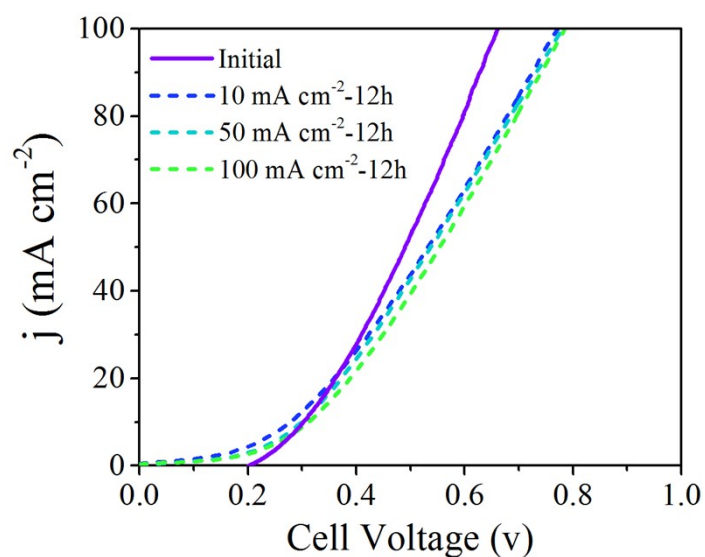

**Fig. S24.** LSV curves of  $\text{SNiC}_2\text{O}_4\text{-Nb}_2\text{O}_5/\text{NF}$  before and after maintaining the current density at 10, 50, and  $100 \text{ mA cm}^{-2}$  for 12 h in OHzS.

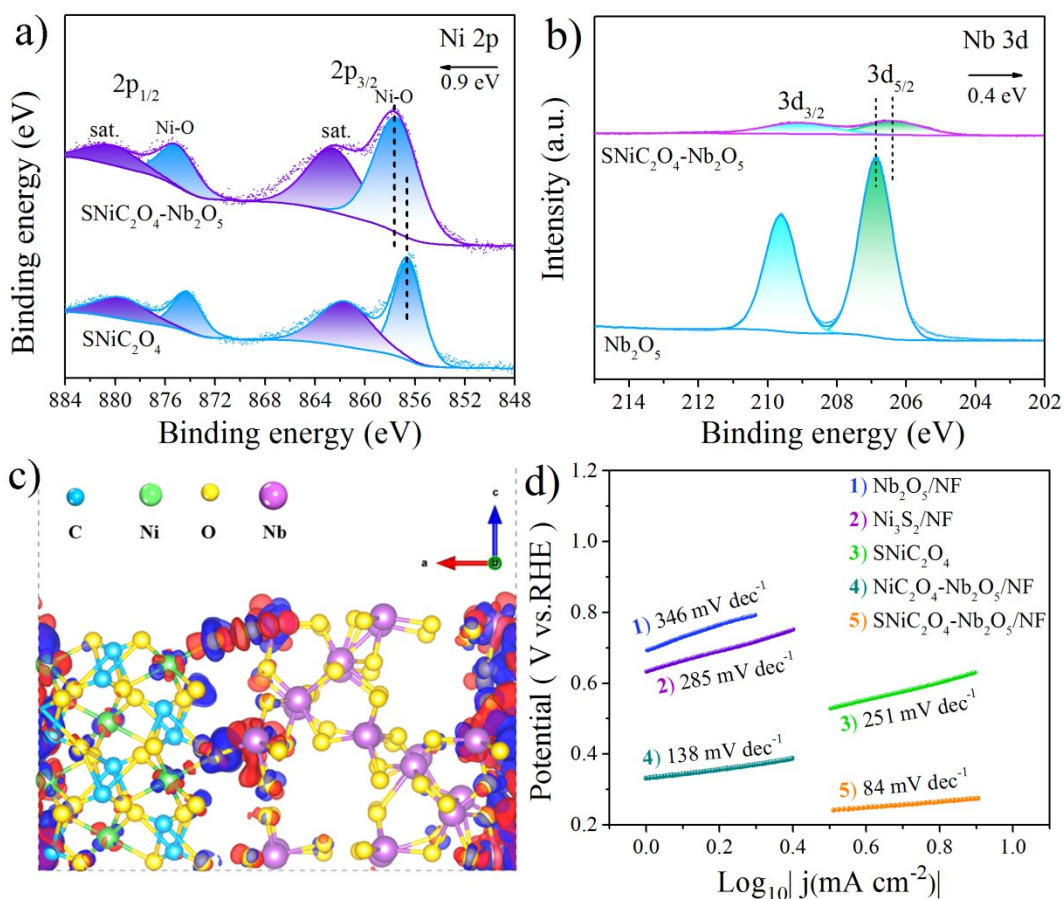

**Fig. S25.** Comparison of XPS spectral data of a) Ni and b) Nb for SNiC<sub>2</sub>O<sub>4</sub>-Nb<sub>2</sub>O<sub>5</sub>, SNiC<sub>2</sub>O<sub>4</sub>, and Nb<sub>2</sub>O<sub>5</sub>. c) The charge density difference of SNiC<sub>2</sub>O<sub>4</sub>-Nb<sub>2</sub>O<sub>5</sub> with isosurface = 0.005 eV/Å<sup>3</sup> (red shadow: electron accumulation and blue shadow: electron depletion). d) Tafel slopes of Nb<sub>2</sub>O<sub>5</sub>, Ni<sub>3</sub>S<sub>2</sub>, SNiC<sub>2</sub>O<sub>4</sub>, NiC<sub>2</sub>O<sub>4</sub>-Nb<sub>2</sub>O<sub>5</sub>, and SNiC<sub>2</sub>O<sub>4</sub>-Nb<sub>2</sub>O<sub>5</sub> grown on NF.

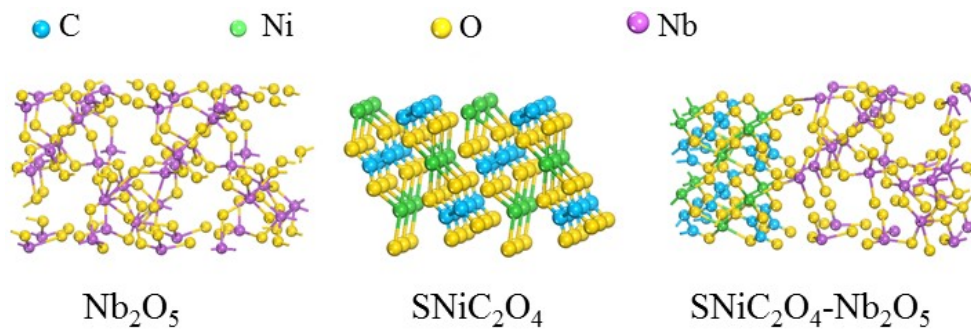

**Fig. S26.** Structural models of the Nb<sub>2</sub>O<sub>5</sub>, SNiC<sub>2</sub>O<sub>4</sub>, and SNiC<sub>2</sub>O<sub>4</sub>-Nb<sub>2</sub>O<sub>5</sub>.

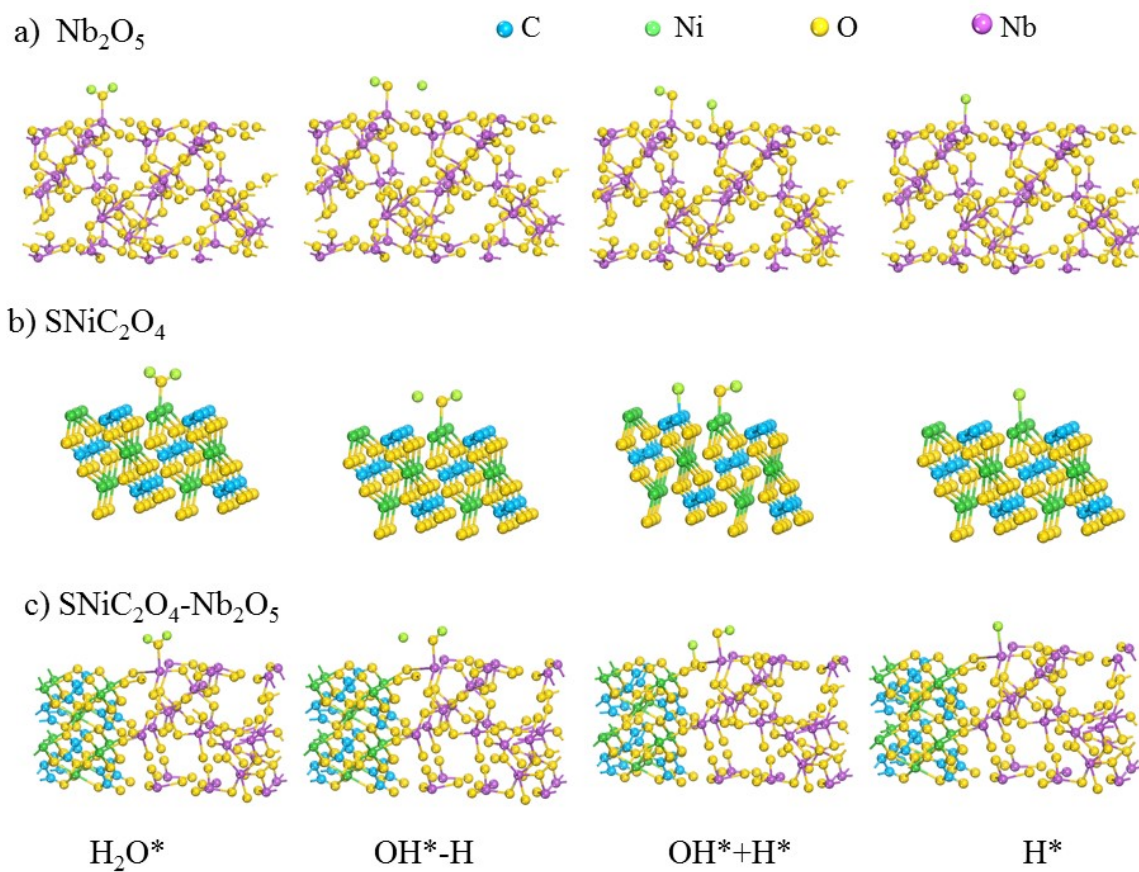

**Fig. S27.** Optimized structure models of  $\text{H}_2\text{O}^*$ ,  $\text{OH}^*\text{-H}$ ,  $\text{OH}^*\text{+H}^*$  and  $\text{H}^*$  adsorbed on a)  $\text{Nb}_2\text{O}_5$ , b)  $\text{SNiC}_2\text{O}_4$ , and c)  $\text{SNiC}_2\text{O}_4\text{-Nb}_2\text{O}_5$ .

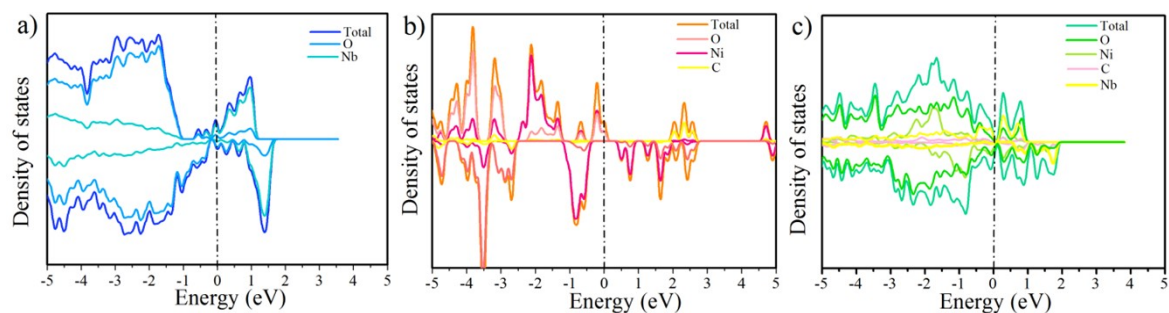

**Fig. S28.** Calculated DOS of a)  $\text{Nb}_2\text{O}_5$ , b)  $\text{SNiC}_2\text{O}_4$ , and c)  $\text{SNiC}_2\text{O}_4\text{-Nb}_2\text{O}_5$ .

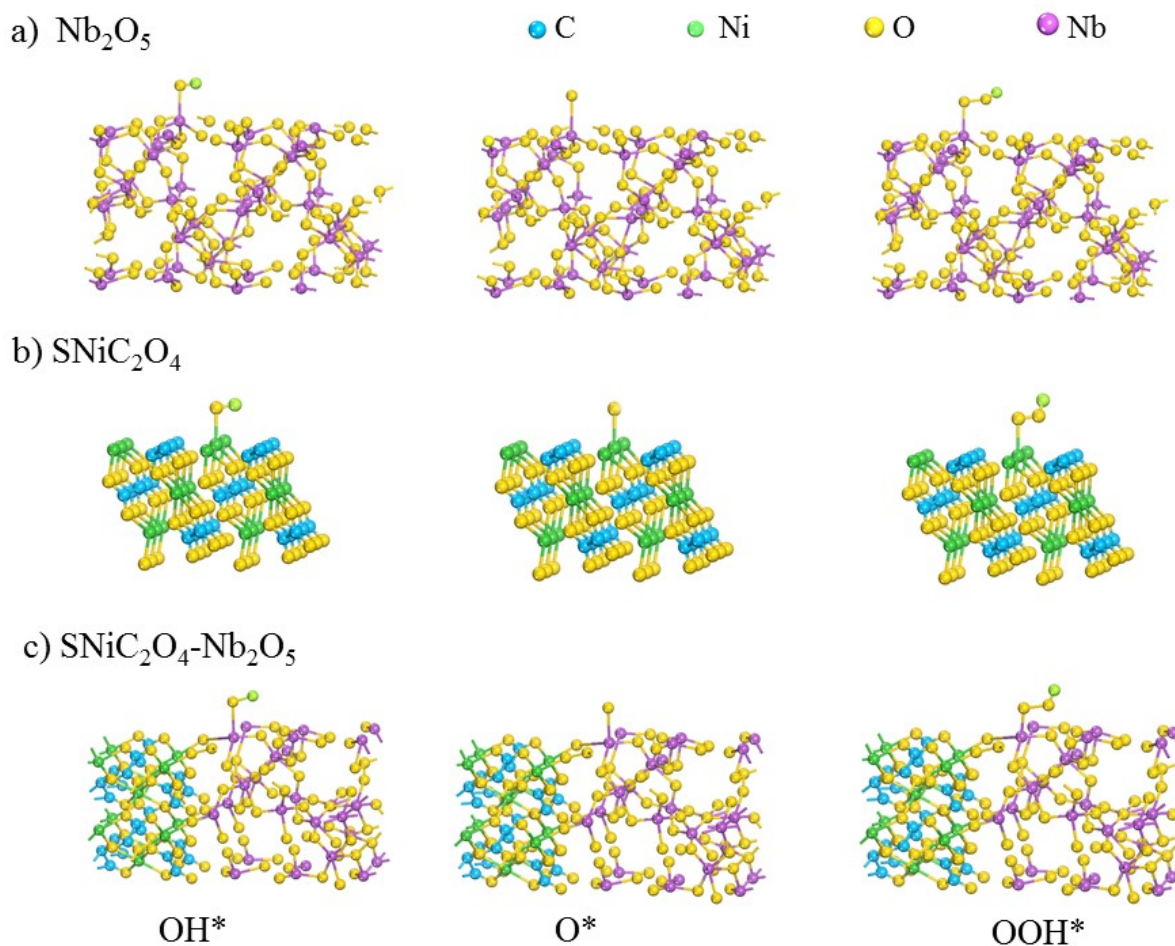

**Fig. S29.** Optimized structure models of a)  $\text{Nb}_2\text{O}_5$ , b)  $\text{SNiC}_2\text{O}_4$  and c)  $\text{SNiC}_2\text{O}_4\text{-Nb}_2\text{O}_5$  for adsorption of intermediates ( $\text{OH}^*$ ,  $\text{O}^*$ , and  $\text{OOH}^*$ ) under OER in an alkaline medium.

**Table S3.** Comparison of electrocatalytic activity for HER of this work with other non-noble metal catalysts in 1.0 M KOH solution.

| Catalyst                                                         | Substrate          | Overpotential                 | Reference |
|------------------------------------------------------------------|--------------------|-------------------------------|-----------|
| NiCo hybrid                                                      | Glassy carbon      | 353 mV@10 mA cm <sup>-2</sup> | 10        |
| CoP <sub>3</sub> NAs <sup>a</sup>                                | Carbon fiber paper | 165 mV@10 mA cm <sup>-2</sup> | 11        |
| Ni <sub>3</sub> S <sub>2</sub>                                   | Ni foam            | 170 mV@10 mA cm <sup>-2</sup> | 12        |
| CoP                                                              | Glassy carbon      | 178 mV@10 mA cm <sup>-2</sup> | 13        |
| FeP                                                              | Carbon cloth       | 202 mV@10 mA cm <sup>-2</sup> | 14        |
| Fe-NiC <sub>2</sub> O <sub>4</sub>                               | Ni foam            | 151 mV@10 mA cm <sup>-2</sup> | 15        |
| NiS                                                              | Ni foam            | 158 mV@20 mA cm <sup>-2</sup> | 16        |
| NiCo <sub>2</sub> S <sub>4</sub>                                 | Carbon cloth       | 190 mV@20 mA cm <sup>-2</sup> | 17        |
| Ni <sub>2</sub> P                                                | Glassy carbon      | 255 mV@20 mA cm <sup>-2</sup> | 18        |
| Co <sub>3</sub> N                                                | Cobalt plate       | 275 mV@20 mA cm <sup>-2</sup> | 19        |
| Ni(OH) <sub>2</sub> nanosheets                                   | Ni foam            | 172 mV@20 mA cm <sup>-2</sup> | 20        |
| Ni <sub>2</sub> P                                                | Ni foam            | 255 mV@20 mA cm <sup>-2</sup> | 18        |
| Ni <sub>1-x</sub> Fe <sub>x</sub> -LDH <sup>b</sup>              | Ni foam            | 319 mV@50 mA cm <sup>-2</sup> | 21        |
| Co <sub>1-x</sub> Fe <sub>x</sub> -LDH                           | Ni foam            | 273 mV@50 mA cm <sup>-2</sup> | 21        |
| NiCo <sub>2</sub> S <sub>4</sub> NS <sup>c</sup>                 | Carbon cloth       | 266 mV@50 mA cm <sup>-2</sup> | 22        |
| Co <sub>0.75</sub> Ni <sub>0.25</sub> Se                         | Ni foam            | 269 mV@50 mA cm <sup>-2</sup> | 23        |
| SNiC <sub>2</sub> O <sub>4</sub> -Nb <sub>2</sub> O <sub>5</sub> | Ni foam            | 125 mV@10 mA cm <sup>-2</sup> | This work |
|                                                                  |                    | 155 mV@20 mA cm <sup>-2</sup> |           |
|                                                                  |                    | 195 mV@50 mA cm <sup>-2</sup> |           |

a) NAs: nanoneedle arrays; b) LDH: layered-double-hydroxide; c) NS: nanosheet



**Table S4.** Comparison of electrocatalytic activity for OER of this work with other non-noble metal catalysts in 1.0 M KOH solution.

| Catalyst                                                                     | Substrate                         | Overpotential                 | Reference |
|------------------------------------------------------------------------------|-----------------------------------|-------------------------------|-----------|
| CoC <sub>2</sub> O <sub>4</sub>                                              | Glassy carbon                     | 348 mV@10 mA cm <sup>-2</sup> | 24        |
| Ni <sub>5</sub> P <sub>4</sub>                                               | Ni foil                           | 470 mV@10 mA cm <sup>-2</sup> | 25        |
| Ni@[Ni <sup>(2+/3+)</sup> Co <sub>2</sub> (OH) <sub>6-7</sub> ] <sub>x</sub> | ITO <sup>a</sup> electrode        | 460 mV@10 mA cm <sup>-2</sup> | 26        |
| α-CoOOH                                                                      | Glassy carbon                     | 320 mV@10 mA cm <sup>-2</sup> | 27        |
| α-Ni(OH) <sub>2</sub>                                                        | Glassy carbon                     | 331 mV@10 mA cm <sup>-2</sup> | 28        |
| Ni <sub>0.7</sub> Fe <sub>0.3</sub> S <sub>2</sub>                           | Ni foam                           | 355 mV@20 mA cm <sup>-2</sup> | 29        |
| NiFe LDH <sup>b</sup>                                                        | Ni foam                           | 330 mV@20 mA cm <sup>-2</sup> | 30        |
| NiFeP/CoP                                                                    | Carbon cloth                      | 250 mV@20 mA cm <sup>-2</sup> | 31        |
| Ni <sub>0.2</sub> Mo <sub>0.8</sub> N/Fe-Ni <sub>3</sub> N                   | Ni foam                           | 266 mV@20 mA cm <sup>-2</sup> | 32        |
| Fe rusts/Ni(OH) <sub>2</sub>                                                 | Fe foam                           | 318 mV@20 mA cm <sup>-2</sup> | 33        |
| W <sub>2</sub> N/WC                                                          | Ni foam                           | 320 mV@20 mA cm <sup>-2</sup> | 34        |
| Ni <sub>1-x</sub> Fe <sub>x</sub> -LDH                                       | Ni foam                           | 300 mV@50 mA cm <sup>-2</sup> | 21        |
| NiFe LDH                                                                     | microwave-reduced GO <sup>c</sup> | 335 mV@50 mA cm <sup>-2</sup> | 35        |
| Ni-P                                                                         | Cu foam                           | 410 mV@50 mA cm <sup>-2</sup> | 36        |
| NiMo HNRs <sup>d</sup>                                                       | Ti mesh                           | 344 mV@50 mA cm <sup>-2</sup> | 37        |
| CoSe                                                                         | Ti mesh                           | 341 mV@50 mA cm <sup>-2</sup> | 38        |
| NiSe@NiOOH                                                                   | Ni foam                           | 332 mV@50 mA cm <sup>-2</sup> | 39        |
| CoP                                                                          | Ni foam                           | 319 mV@50 mA cm <sup>-2</sup> | 40        |
| SNiC <sub>2</sub> O <sub>4</sub> -Nb <sub>2</sub> O <sub>5</sub>             | Ni foam                           | 293 mV@20 mA cm <sup>-2</sup> | This work |
|                                                                              |                                   | 360 mV@50 mA cm <sup>-2</sup> |           |

a) ITO: indium tin oxide; b) LDH: layered-double-hydroxide; c) GO: graphene oxide; d) HNRs: hollow nanorod arrays.

**Table S5.** The content of the corresponding valence states of Ni and Nb in  $\text{SNiC}_2\text{O}_4\text{-Nb}_2\text{O}_5$  before and after the test.

| Catalyst  | $\text{Ni}^{2+}/\%$ | $\text{Ni}^{3+}/\%$ | $\text{Nb}^{3+}/\%$ | $\text{Nb}^{4+}/\%$ | $\text{Nb}^{5+}/\%$ |
|-----------|---------------------|---------------------|---------------------|---------------------|---------------------|
| initial   | 72                  | 30                  | 26                  | 37                  | 37                  |
| after HER | 75                  | 25                  | 8                   | 36                  | 56                  |
| after OER | 55                  | 45                  | -                   | 25                  | 75                  |

The corresponding data were obtained from the XPS spectra, and the content of the valence states is calculated by the following formula:

$$\text{Ni}^{2+} = \text{Ni}^{2+} / (\text{Ni}^{2+} + \text{Ni}^{3+}) \quad \text{Eq. (11)}$$

$$\text{Ni}^{3+} = \text{Ni}^{3+} / (\text{Ni}^{2+} + \text{Ni}^{3+}) \quad \text{Eq. (12)}$$

$$\text{Nb}^{3+} = \text{Nb}^{3+} / (\text{Nb}^{3+} + \text{Nb}^{4+} + \text{Nb}^{5+}) \quad \text{Eq. (13)}$$

$$\text{Nb}^{4+} = \text{Nb}^{4+} / (\text{Nb}^{3+} + \text{Nb}^{4+} + \text{Nb}^{5+}) \quad \text{Eq. (14)}$$

$$\text{Nb}^{5+} = \text{Nb}^{5+} / (\text{Nb}^{3+} + \text{Nb}^{4+} + \text{Nb}^{5+}) \quad \text{Eq. (15)}$$

**Table S6.** Comparison of electrocatalytic activity for overall water splitting of this work with other non-noble metal catalysts in 1.0 M KOH solution.

| Catalyst                                                                         | Substrate         | Cell voltage                  | Reference |
|----------------------------------------------------------------------------------|-------------------|-------------------------------|-----------|
| Ni <sub>0.5</sub> Co <sub>0.5</sub> /NC <sup>a</sup>                             | N-carbon films    | 1.75 V@10 mA cm <sup>-2</sup> | 41        |
| Co <sub>3</sub> O <sub>4</sub> /N-doped carbon                                   | Ni foam           | 1.74 V@10 mA cm <sup>-2</sup> | 42        |
| SrTi <sub>0.1</sub> Fe <sub>0.85</sub> Ni <sub>0.05</sub> O <sub>3-δ</sub>       | Ni foam           | 1.80 V@10 mA cm <sup>-2</sup> | 43        |
| Co-ZnO nanowires                                                                 | Cu foam           | 2.01 V@10 mA cm <sup>-2</sup> | 44        |
| S-NiFe <sub>2</sub> O <sub>4</sub>                                               | Ni foam           | 1.95 V@10 mA cm <sup>-2</sup> | 45        |
| Co@Co <sub>3</sub> O <sub>4</sub>                                                | Ni foam           | 2.00 V@10 mA cm <sup>-2</sup> | 46        |
| Ni foam                                                                          | Ni foam           | 2.00 V@10 mA cm <sup>-2</sup> | 47        |
| Co-S/Carbon tube                                                                 | Carbon paper      | 1.74 V@10 mA cm <sup>-2</sup> | 48        |
| NiFe@NC                                                                          | Ni foam           | 1.81 V@10 mA cm <sup>-2</sup> | 49        |
| Vanadium nanobelts                                                               | Ni foam           | 1.74 V@10 mA cm <sup>-2</sup> | 50        |
| NiFeO <sub>x</sub>                                                               | Carbon nanofibres | 1.88 V@10 mA cm <sup>-2</sup> | 51        |
| Ni(OH) <sub>2</sub> /NiSe                                                        | Carbon paper      | 1.78 V@10 mA cm <sup>-2</sup> | 52        |
| Ni <sub>12</sub> P <sub>5</sub> /Ni <sub>3</sub> (PO <sub>4</sub> ) <sub>2</sub> | Ni foam           | 1.76 V@10 mA cm <sup>-2</sup> | 53        |
| Co-P film                                                                        | Au foil           | 1.73 V@10 mA cm <sup>-2</sup> | 54        |
| FeCoNi                                                                           | Carbon cloth      | 1.67 V@10 mA cm <sup>-2</sup> | 55        |
| SNiC <sub>2</sub> O <sub>4</sub> -Nb <sub>2</sub> O <sub>5</sub>                 | Ni foam           | 1.66 V@10 mA cm <sup>-2</sup> | This work |
|                                                                                  |                   | 1.74 V@20 mA cm <sup>-2</sup> |           |

a) NC: nitrogen-doped carbon

## References

1. G. Kresse and J. Furthmüller, *Phys. Rev. B*, 1996, **54**, 11169-11186.
2. J. P. Perdew, K. Burke and M. Ernzerhof, *Phys. Rev. Lett.*, 1996, **77**, 3865-3868.
3. G. Kresse and D. Joubert, *Phys. Rev. B*, 1999, **59**, 1758-1775.
4. P. E. Blöchl, *Phys. Rev. B*, 1994, **50**, 17953-17979.
5. S. Grimme, J. Antony, S. Ehrlich and H. Krieg, *J. Chem. Phys.*, 2010, **132**, 154104.
6. G. Henkelman, B. P. Uberuaga and H. Jónsson, *J. Chem. Phys.*, 2000, **113**, 9901-9904.
7. Y. Yan, J.-Y. Zhang, X.-R. Shi, Y. Zhu, C. Xia, S. Zaman, X. Hu, X. Wang and B. Y. Xia, *ACS Nano*, 2021, **15**, 10286-10295.
8. Y. Liu, J. Zhang, Y. Li, Q. Qian, Z. Li and G. Zhang, *Adv. Funct. Mater.*, 2021, **31**, 2103673.
9. Q. Qian, J. Zhang, J. Li, Y. Li, X. Jin, Y. Zhu, Y. Liu, Z. Li, A. El-Harairy, C. Xiao, G. Zhang and Y. Xie, *Angew. Chem. Int. Ed.*, 2021, **60**, 5984-5993.
10. J. Saha, R. Ball and C. Subramaniam, *ACS Sustainable Chem. Eng.*, 2021, **9**, 7792-7802.
11. T. Wu, M. Pi, D. Zhang and S. Chen, *J. Mater. Chem. A*, 2016, **4**, 14539-14544.
12. L.-L. Feng, G. Yu, Y. Wu, G.-D. Li, H. Li, Y. Sun, T. Asefa, W. Chen and X. Zou, *J. Am. Chem. Soc.*, 2015, **137**, 14023-14026.
13. J. Ma, M. Wang, G. Lei, G. Zhang, F. Zhang, W. Peng, X. Fan and Y. Li, *Small*, 2018, **14**, 1702895.
14. Y. Liang, Q. Liu, A. M. Asiri, X. Sun and Y. Luo, *ACS Catal.*, 2014, **4**, 4065-4069.
15. X. Wang, P. He, Y. Yang, F. Zhang, J. Tang and R. Que, *Electrochim. Acta*, 2020, **345**, 136228.
16. W. Zhu, X. Yue, W. Zhang, S. Yu, Y. Zhang, J. Wang and J. Wang, *Chem. Commun.*, 2016, **52**, 1486-1489.
17. D. Liu, Q. Lu, Y. Luo, X. Sun and A. M. Asiri, *Nanoscale*, 2015, **7**, 15122-15126.
18. L.-A. Stern, L. Feng, F. Song and X. Hu, *Energy Environ. Sci.*, 2015, **8**, 2347-2351.
19. Z. Xu, W. Li, Y. Yan, H. Wang, H. Zhu, M. Zhao, S. Yan and Z. Zou, *ACS Appl. Mater. Interfaces*, 2018, **10**, 22102-22109.
20. Y. Rao, Y. Wang, H. Ning, P. Li and M. Wu, *ACS Appl. Mater. Interfaces*, 2016, **8**, 33601-33607.
21. G. Rajeshkhanna, T. I. Singh, N. H. Kim and J. H. Lee, *ACS Appl. Mater. Interfaces*, 2018, **10**,

42453-42468.

22. R. Zhang, R. Hu, X. Li, Z. Zhen, Z. Xu, N. Li, L. He and H. Zhu, *Adv. Funct. Mater.*, 2018, **28**, 1705879.
23. S. Liu, Y. Jiang, M. Yang, M. Zhang, Q. Guo, W. Shen, R. He and M. Li, *Nanoscale*, 2019, **11**, 7959-7966.
24. X. Liu, J. Jiang and L. Ai, *J. Mater. Chem. A*, 2015, **3**, 9707-9713.
25. M. Ledendecker, S. Krick Calderón, C. Papp, H.-P. Steinrück, M. Antonietti and M. Shalom, *Angew. Chem. Int. Ed.*, 2015, **54**, 12361-12365.
26. Z. Zhao, H. Wu, H. He, X. Xu and Y. Jin, *Adv. Funct. Mater.*, 2014, **24**, 4698-4705.
27. P. F. Liu, S. Yang, L. R. Zheng, B. Zhang and H. G. Yang, *J. Mater. Chem. A*, 2016, **4**, 9578-9584.
28. M. Gao, W. Sheng, Z. Zhuang, Q. Fang, S. Gu, J. Jiang and Y. Yan, *J. Am. Chem. Soc.*, 2014, **136**, 7077-7084.
29. J. Yu, G. Cheng and W. Luo, *J. Mater. Chem. A*, 2017, **5**, 15838-15844.
30. J. Luo, J.-H. Im, M. T. Mayer, M. Schreier, M. K. Nazeeruddin, N.-G. Park, S. D. Tilley, H. J. Fan and M. Grätzel, *Science*, 2014, **345**, 1593.
31. X. Jiang, Y. Li, M. He, L. Zhou, Q. Zheng, F. Xie, W. Jie and D. Lin, *Int. J. Hydrogen Energy*, 2019, **44**, 19986-19994.
32. C. Liu, H. Zhu, S. Lu, F. Xu, F. Duan and M. Du, *RSC Adv.*, 2021, **11**, 19797-19804.
33. X. Liu, X. Guo, M. Gong, S. Deng, J. Liang, T. Zhao, Y. Lu, Y. Zhu, J. Zhang and D. Wang, *Electrochim. Acta*, 2020, **353**, 136478.
34. J. Diao, Y. Qiu, S. Liu, W. Wang, K. Chen, H. Li, W. Yuan, Y. Qu and X. Guo, *Adv. Mater.*, 2020, **32**, 1905679.
35. D. Voiry, J. Yang, J. Kupferberg, R. Fullon, C. Lee, H. Y. Jeong, H. S. Shin and M. Chhowalla, *Science*, 2016, **353**, 1413.
36. Q. Liu, S. Gu and C. M. Li, *Journal of Power Sources*, 2015, **299**, 342-346.
37. J. Tian, N. Cheng, Q. Liu, X. Sun, Y. He and A. M. Asiri, *J. Mater. Chem. A*, 2015, **3**, 20056-20059.
38. T. Liu, Q. Liu, A. M. Asiri, Y. Luo and X. Sun, *Chem. Commun.*, 2015, **51**, 16683-16686.
39. X. Li, G.-Q. Han, Y.-R. Liu, B. Dong, W.-H. Hu, X. Shang, Y.-M. Chai and C.-G. Liu, *ACS*

- Appl. Mater. Interfaces*, 2016, **8**, 20057-20066.
40. G. Li, L. Li and Z. Lin, *Int. J. Hydrogen Energy*, 2021, **46**, 18224-18232.
  41. B. Bayatsarmadi, Y. Zheng, V. Russo, L. Ge, C. S. Casari and S.-Z. Qiao, *Nanoscale*, 2016, **8**, 18507-18515.
  42. B. Wang, L. Xu, G. Liu, P. Zhang, W. Zhu, J. Xia and H. Li, *J. Mater. Chem. A*, 2017, **5**, 20170-20179.
  43. X. Wu, J. Yu, G. Yang, H. Liu, W. Zhou and Z. Shao, *Electrochim. Acta*, 2018, **286**, 47-54.
  44. G. Li, X. Wang, M. H. Seo, S. Hemmati, A. Yu and Z. Chen, *J. Mater. Chem. A*, 2017, **5**, 10895-10901.
  45. J. Liu, D. Zhu, T. Ling, A. Vasileff and S.-Z. Qiao, *Nano Energy*, 2017, **40**, 264-273.
  46. C. Bai, S. Wei, D. Deng, X. Lin, M. Zheng and Q. Dong, *J. Mater. Chem. A*, 2017, **5**, 9533-9536.
  47. Y. Zhu, W. Zhou, Y. Zhong, Y. Bu, X. Chen, Q. Zhong, M. Liu and Z. Shao, *Adv. Energy Mater.*, 2017, **7**, 1602122.
  48. J. Wang, H.-x. Zhong, Z.-l. Wang, F.-l. Meng and X.-b. Zhang, *ACS Nano*, 2016, **10**, 2342-2348.
  49. Z. Zhang, Y. Qin, M. Dou, J. Ji and F. Wang, *Nano Energy*, 2016, **30**, 426-433.
  50. Y. Yu, P. Li, X. Wang, W. Gao, Z. Shen, Y. Zhu, S. Yang, W. Song and K. Ding, *Nanoscale*, 2016, **8**, 10731-10738.
  51. H. Wang, H.-W. Lee, Y. Deng, Z. Lu, P.-C. Hsu, Y. Liu, D. Lin and Y. Cui, *Nat. Commun.*, 2015, **6**, 7261.
  52. H. Liang, L. Li, F. Meng, L. Dang, J. Zhuo, A. Forticaux, Z. Wang and S. Jin, *Chem. Mater.*, 2015, **27**, 5702-5711.
  53. A. Sivanantham and S. Shanmugam, *Appl. Catal. B Environ.*, 2017, **203**, 485-493.
  54. J. A. Vigil and T. N. Lambert, *RSC Adv.*, 2015, **5**, 105814-105819.
  55. Y. Yang, Z. Lin, S. Gao, J. Su, Z. Lun, G. Xia, J. Chen, R. Zhang and Q. Chen, *ACS Catal.*, 2017, **7**, 469-479.
